# Supplementary material for: Short-term variation in abundance of four Acartia species (Copepoda, Calanoida) in a eutrophic bay
Source: PeerJ. 2021 Mar 10;9:e10835. doi: 10.7717/peerj.10835 (PMC7955669; doi:10.7717/peerj.10835)
Supplement: Supplemental Information 1 [file peerj-09-10835-s001.xlsx]

## Sheet: Density
		Acartia ohtsukai	Acartia sinjiensis	Acartia erythraea	Acartia omorii	Acartia copepodites
2007	Oct. 5	0	8726.33	6645.95	0	698.104
	Oct.11	0	154.612	36.7623	0	30.0635
	Oct.17	0	22.5844	5.51461	0	55.1461
	Oct.24	0	29.7437	9.91457	0	257.779
	Nov.03	0	5.43422	16.3267	13.2523	499.948
	Nov.10	0	0	5.68274	132.597	390.215
	Nov.17	0	0	0	17.9323	283.489
	Nov.25	0	0	0	4391.15	2628.88
	Dec.03	0	0	0	165.275	4398.16
	Dec.11	0	0	0	3139.26	13395.4
	Dec.20	0	0	0	1292.18	1040.6
	Dec.28	0	0	0	1129.33	1995.51
2008	Jan.07	0	0	0	493.722	338.394
	Jan.14	0	0	0	5.75796	50.7508
	Jan.24	0	0	0	177.518	546.568
	Jan.31	0	0	0	58.6554	32.5863
	Feb.05	0	0	0	17.2558	194.997
	Feb.13	0	0	0	65.3845	67.0735
	Feb.21	0	0	0	5.31541	10.6308
	Feb.28	0	0	0	8.96124	20.9096
	Mar.5	0	0	0	153.332	47.9162
	Mar.12	0	0	0	339.756	717.262
	Mar.19	0	0	0	135.939	250.965
	Mar.26	0	0	0	619.414	550.579
	Apr.2	0	0	0	49.8176	280.467
	Apr.11	0	0	0	448.146	798.183
	Apr.18	0	0	0	656.615	667.205
	Apr.24	0	0	0	32.7218	1054.35
	Apr.30	0	0	0	116.953	146.191
	May.8	0	0	0	154.524	2674.71
	May.15	0	0	0	184.288	468.617
	May.23	0	0	0	14.4448	64.2737
	May.31	0	0	0	12	68
	Jun.5	0	0	0	18	120
	Jun.11	0	0	0	195.714	326.189
	Jun.23	0	0	0	784.816	1200.31
	Jun.30	0	0	0	588.612	168.175
	Jul.10	49.7523	0	1689.98	0	596.46
	Jul.18	198.829	149.116	1491.16	0	894.69
	Jul.24	215.699	143.38	35.845	0	179.225
	Aug.1	63.8714	1548.53	1777.91	0	2752.89
	Aug.6	33.4339	3811.46	635.244	0	4413.27
	Aug.13	3976.42	458.816	458.816	0	7646.93
	Aug.21	91.2188	6748.94	547.211	0	2280.05
	Aug.27	32.6776	19561.3	6734.23	0	10903
	Sep.4	15.5594	2954.17	3798.21	0	1477.08
	Sep.11	1	334.254	233.387	0	2118.11
	Sep.19	1.74316	923.912	15.4425	0	290.065
	Sep.23	1	488.554	223.354	0	212.415
	Total abundance	4681.2	46061.2	24360.9	15618.6	70302.8

## Sheet: Environmetal factors
		temperature			salinity			Chl-a
		Surface	Bottom	Average	Surface	Bottom	Average	Surface	Bottom	Average
2007	Oct. 5	24.4	23.9	24.15	29.6	28.4	29	41.272	27.1539	34.2129
	Oct.11	22.9	23.1	23	30.1	30.1	30.1	13.6196	8.54875	11.0842
	Oct.17	21.6	21.1	21.35	30.5	30.8	30.65	15.0682	14.1822	14.6252
	Oct.24	20.4	19.3	19.85	28.9	29.9	29.4	26.2455	12.3945	19.32
	Nov.03	17.9	17.4	17.65	28.5	32.96	30.73	4.41941	22.8884	13.6539
	Nov.10	16.9	16	16.45	29.6	30.3	29.95	4.01	10.95	7.48
	Nov.17	15.2	14	14.6	28.5	30.2	29.35	6.5	11.81	9.155
	Nov.25	12.7	11.8	12.25	29.1	30.4	29.75	7.65	10.16	8.905
	Dec.03	13.3	10.9	12.1	30	30.7	30.35	6.05	18.5	12.275
	Dec.11	11.6	9	10.3	29.7	30.7	30.2	5.89	3.06	4.475
	Dec.20	9.3	7.9	8.6	29	30.4	29.7	3.07	20.6	11.835
	Dec.28	10.3	8.6	9.45	29.7	30.6	30.15	3.4	18	10.7
2008	Jan.07	8.3	7.1	7.7	30.4	31.4	30.9	4.3	11	7.65
	Jan.14	8.8	7.4	8.1	30	30.5	30.25	3.8	2.8	3.3
	Jan.24	5	5.1	5.05	30.8	30.8	30.8	1.97	2.36	2.165
	Jan.31	6.3	4.4	5.35	30	30.4	30.2	2.4	3.09	2.745
	Feb.05	4.8	3.9	4.35	30.9	30.3	30.6	4.18	3.95	4.065
	Feb.13	6.7	3.8	5.25	31	31.5	31.25	1.08	1.97	1.525
	Feb.21	4.7	4	4.35	30	31	30.5	1.84	2.8	2.32
	Feb.28	6.5	6.9	6.7	32.4	33.6	33	2.44	6.15	4.295
	Mar.5	7.6	7	7.3	31.3	31.9	31.6	8.75511	3.54637	6.15074
	Mar.12	9.7	8.4	9.05	31	32.3	31.65	4.49568	10.6363	7.56597
	Mar.19	10.6	9.8	10.2	29.2	32.1	30.65	3.02119	3.14672	3.08396
	Mar.26	13.2	12	12.6	32.4	32.8	32.6	5.14367	4.44487	4.79427
	Apr.2	11.1	11	11.05	32.1	32.9	32.5	6.79711	6.70901	6.75306
	Apr.11	13.8	13.7	13.75	30.6	31.5	31.05	2.07377	1.72889	1.90133
	Apr.18	15.6	15.9	15.75	32	32.5	32.25	3.13649	3.34254	3.23952
	Apr.24	15.8	16	15.9	32	32.6	32.3	3.40002	2.89372	3.14687
	Apr.30	19.5	17.9	18.7	32.5	33.3	32.9	4.85041	2.34729	3.59885
	May.8	19.8	19.2	19.5	32.5	34.15	33.325	4.21374	3.68989	3.95181
	May.15	19	18	18.5	31.7	32.8	32.25	5.61902	9.94525	7.78213
	May.23	21.3	20	20.65	31.5	33	32.25	6.99789	2.99646	4.99717
	May.31	22	21	21.5	30.8	31.6	31.2	6.25162	4.5955	5.42356
	Jun.5	23.8	22	22.9	29.6	31.6	30.6	4.24559	4.56527	4.40543
	Jun.11	24	23.6	23.8	30.3	30.9	30.6	13.2347	11.7309	12.4828
	Jun.23	23.8	23.2	23.5	29.4	30.7	30.05	9.26442	10.181	9.72273
	Jun.30	23.2	23	23.1	28.6	30.2	29.4	7.3356	3.77514	5.55537
	Jul.10	29	26.4	27.7	27.3	29	28.15	6.03166	4.37003	5.20084
	Jul.18	29.8	26.4	28.1	29.7	30.9	30.3	5.84846	1.7829	3.81568
	Jul.24	31.4	30.2	30.8	29.5	30.8	30.15	5.70367	8.16948	6.93658
	Aug.1	30.5	30.1	30.3	31.8	31.4	31.6	10.9126	11.2146	11.0636
	Aug.6	29.6	29.2	29.4	30.8	32.1	31.45	6.32473	5.8397	6.08222
	Aug.13	31.4	29.4	30.4	29.8	30.4	30.1	17.3416	4.92474	11.1332
	Aug.21	27.8	27.1	27.45	29.6	30.8	30.2	12.0719	13.659	12.8654
	Aug.27	28.3	27.6	27.95	30.2	30	30.1	3.79	8.67	6.23
	Sep.4	27.8	27.5	27.65	30.1	31.2	30.65	10.9	12.16	11.53
	Sep.11	28.8	27.6	28.2	31.9	31.1	31.5	4.44	8.4	6.42
	Sep.19	29.6	27.4	28.5	31.3	31	31.15	13.72	13.98	13.85
	Sep.23	26.8	26.7	26.75	30.3	30.1	30.2	6	12.33	9.165
